# Supplementary material
Source: publisher figshare collection journal article supplement (https://plos.figshare.com/articles/dataset/_/3875148)
Supplement: Supplementary file [file 1]

# Supporting Information A

Kinetic parameters of the reaction rates listed in Table 2.

| Parameter         | Value                                                |
|-------------------|------------------------------------------------------|
| $K_1$             | 18.7 mM                                              |
| $K_2$             | 11.8 mM                                              |
| $K_3$             | 10.0 mM                                              |
| $K_4$             | 3.08 mM                                              |
| $K_5$             | 1.00 mM                                              |
| $K_6$             | 0.00350 mM                                           |
| $K_7$             | 0.0655 mM                                            |
| $K_9$             | $1.15 \times 10^4$ mM                                |
| $K_{12}$          | $1.40 \times 10^{-4}$ mM                             |
| $K_{14}$          | $1.00 \times 10^{-6}$ mM                             |
| $K_i$             | 1340 mM                                              |
| $K_X$             | 0.177 mM                                             |
| $V_1$             | $1.61 \text{ h}^{-1}$                                |
| $V_2$             | $25.5 \text{ h}^{-1}$                                |
| $V_3$             | $100 \text{ h}^{-1}$                                 |
| $V_4$             | $23.2 \text{ h}^{-1}$                                |
| $V_5$             | $1.00 \text{ h}^{-1}$                                |
| $V_6$             | $2.18 \text{ h}^{-1}$                                |
| $V_7$             | $8.80 \text{ h}^{-1}$                                |
| $V_9$             | $9.82 \times 10^6 \text{ h}^{-1}$                    |
| $V_{12}$          | $475 \text{ h}^{-1}$                                 |
| $V_{14}$          | $600 \text{ h}^{-1}$                                 |
| $\alpha_8$        | $4.53 \times 10^3 \text{ mM}^{-2} \text{ h}^{-1}$    |
| $\alpha_{10}$     | $0.0761 \text{ mM}^{-2} \text{ h}^{-1}$              |
| $\alpha_{11}$     | $1.35 \times 10^{-4} \text{ mM}^{-2} \text{ h}^{-1}$ |
| $\alpha_{13}$     | $5.00 \times 10^6 \text{ mM}^{-2} \text{ h}^{-1}$    |
| $\alpha_{15}$     | $3.47 \times 10^6 \text{ mM}^{-2} \text{ h}^{-1}$    |
| $\mu_{\max}$      | $0.126 \text{ h}^{-1}$                               |
| $r_{\text{Ad}}$   | $5.47 \times 10^{-3} \text{ mM h}^{-1}$              |
| $r_{\text{Cf}}$   | $3.24 \times 10^{-4} \text{ mM h}^{-1}$              |
| $r_{\text{Ah}}$   | $0.289 \text{ mM h}^{-1}$                            |
| $r_{\text{Ad}}^+$ | $19.3 \text{ mM h}^{-1}$                             |
| $r_{\text{Cf}}^+$ | $5.78 \times 10^{-4} \text{ mM h}^{-1}$              |
| $r_{\text{Ah}}^+$ | $10.9 \text{ mM h}^{-1}$                             |
