# Supplementary material
Source: publisher figshare collection journal article supplement (https://plos.figshare.com/articles/dataset/_/3875148)
Supplement: Supplementary file [file 1]

## Supporting Information B

The parameter bounds considered in the parameter estimation problem (5).

| Parameter     | Bound                                              |
|---------------|----------------------------------------------------|
| $K_1$         | $[10^{-6}, 10^2]$ mM                               |
| $K_6$         | $[10^{-6}, 10^2]$ mM                               |
| $K_7$         | $[10^{-6}, 10^2]$ mM                               |
| $K_9$         | $[1, 2 \times 10^5]$ mM                            |
| $K_i$         | $[10^{-2}, 10^4]$ mM                               |
| $V_1$         | $[10^{-2}, 10^5]$ h <sup>-1</sup>                  |
| $V_9$         | $[10^{-2}, 10^5]$ h <sup>-1</sup>                  |
| $\alpha_8$    | $[10^{-2}, 10^5]$ mM <sup>-2</sup> h <sup>-1</sup> |
| $\alpha_{10}$ | $[10^{-2}, 10^5]$ mM <sup>-2</sup> h <sup>-1</sup> |
| $\mu_{\max}$  | $[0.05, 0.8]$ h <sup>-1</sup>                      |
| $r_{Ah}^+$    | $[10^{-2}, 50]$ mM h <sup>-1</sup>                 |
